# Supplementary material for: Preparation, characterization and catalytic performance of rod-like Ni–Nb–O catalysts for the oxidative dehydrogenation of ethane at low temperature
Source: Royal Society of Chemistry journal article supplement (doi:10.1039/c9cy00519f), 2019-01-01
Supplement: c9cy00519f1.pdf [file c9cy00519f1.pdf]

## Supporting information

### Preparation, Characterization and Catalytic Performance of Rod-like Ni-Nb-O Catalysts for the Oxidative Dehydrogenation of Ethane at Low Temperature

Lian Kong,<sup>a</sup> Dong Li,<sup>a</sup> Zhen Zhao,<sup>\*ab</sup> Jianmei Li,<sup>b</sup> Linlin Zhao,<sup>a</sup> Xiaoqiang Fan,<sup>a</sup> Xia Xiao<sup>a</sup> and Zean Xie<sup>b</sup>

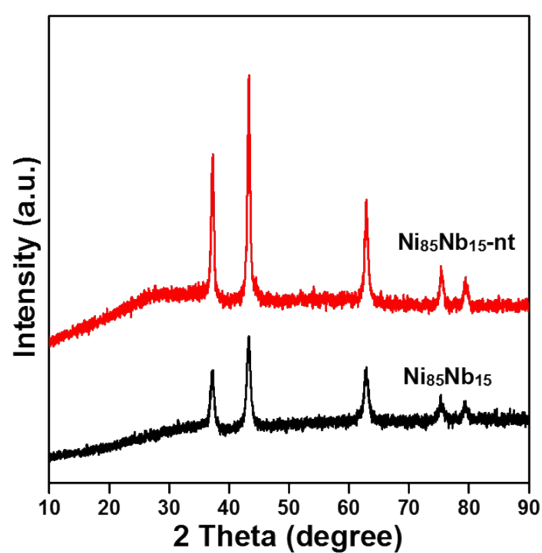

**Fig. S1** X-Ray diffraction patterns of the Ni<sub>85</sub>Nb<sub>15</sub> mixed oxides with and without the PEG-4000.

---
